# Supplementary material for: Probabilistic boolean networks predict transcription factor targets to induce transdifferentiation
Source: PubMed Central journal article supplement — iScience. 2022 Aug 17;25(9):104951. doi: 10.1016/j.isci.2022.104951 (PMC9460527; doi:10.1016/j.isci.2022.104951), 2022-08-17
Supplement: mmc1.pdf [file mmc1.pdf]

iScience, Volume 25

## **Supplemental information**

### **Probabilistic boolean networks predict transcription factor targets to induce transdifferentiation**

**Bahar Tercan, Boris Aguilar, Sui Huang, Edward R. Dougherty, and Ilya Shmulevich**

**This Supporting Information contains:**

**Figure S1.** Histogram of non-zero counts before and after imputation, Related to Star Methods.

**Figure S2.** The t-SNE plot of data used in building PBNs, showing that the two cell types, Progenitor B and Monocyte, are easily distinguishable using 30 binarized transcription factors, Related to Star Methods.

**Table S1.** The transcription factor list, Related to Star Methods.

**Figure S1.** Histogram of non-zero counts before and after imputation, Related to Star Methods.

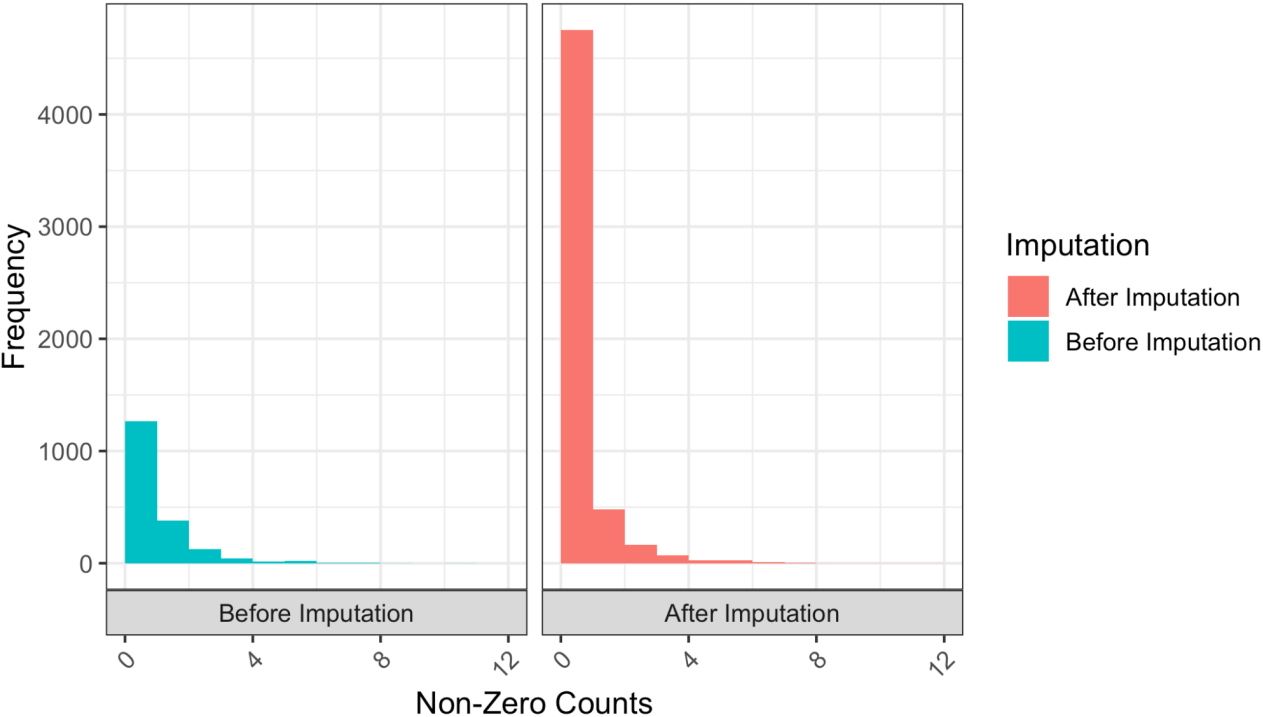

**Figure S2.** The t-SNE plot of data used in building PBNs, showing that the two cell types, Progenitor B and Monocyte, are easily distinguishable using 30 binarized transcription factors, Related to Star Methods.

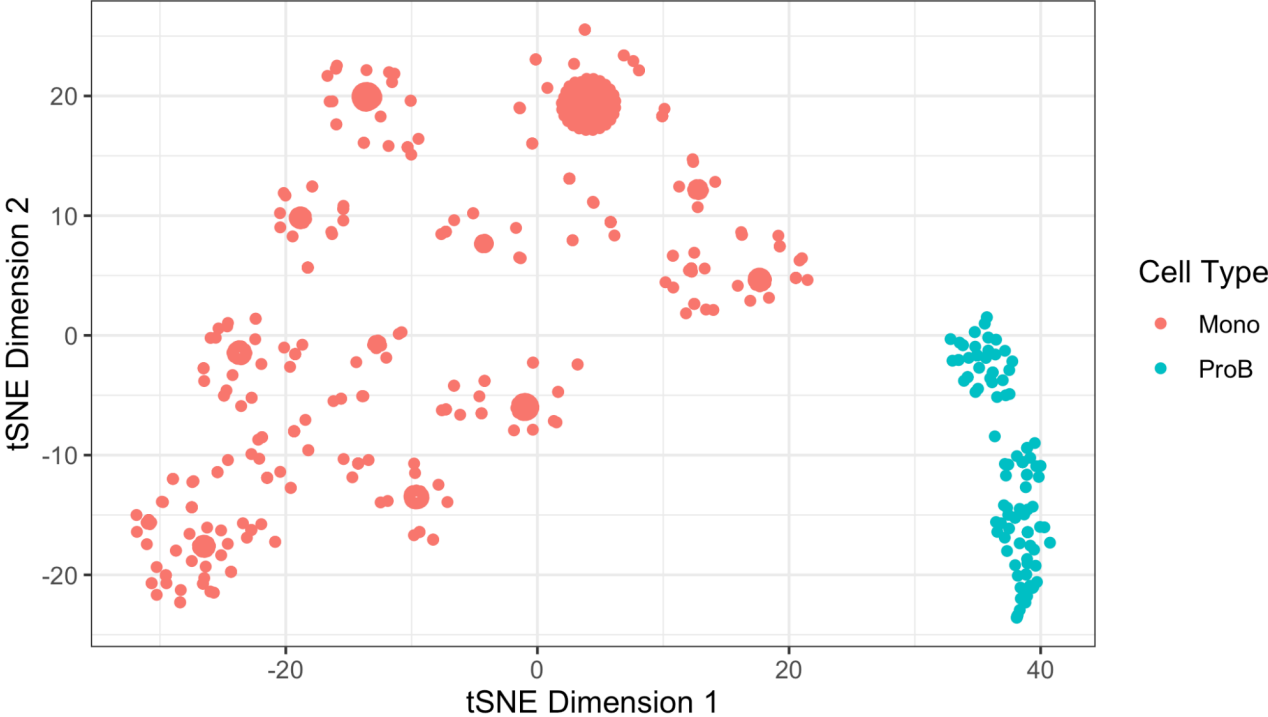

**Table S1.** The transcription factor list, Related to Star Methods

| <b>Transcription Factor</b> | <b>Gene name</b> | <b>Cell type</b>                       |
|-----------------------------|------------------|----------------------------------------|
| CEBPa                       | CEBPA            | Mac                                    |
| CEBPb                       | CEBPB            | Mac                                    |
| CTCF                        | CTCF             | ES, Pre-Adi, Pro-B cell                |
| E2A                         | TCF3             | Pre-Pro-B cell                         |
| EBF                         | EBF1             | Pro-B cell                             |
| ERG                         | ERG              | HPC7                                   |
| Eto2                        | CBFA2T3          | Ery_MEL, Ind_Ery_MEL                   |
| Fli1                        | FLI1             | HPC7                                   |
| Foxo1                       | FOXO1            | Pro-B cell                             |
| Gata1                       | GATA1            | Ery_G1ER, Ery_MEL, Ind_Ery_MEL         |
| Gata2                       | GATA2            | eHPC, HPC7                             |
| Gfi1b                       | GFI1B            | HPC7                                   |
| Ldb1                        | LDB1             | Ery_MEL, eHPC, Ind_Ery_MEL             |
| Lmo2                        | LMO2             | HPC7                                   |
| Lyl1                        | LYL1             | HPC7                                   |
| Meis1                       | MEIS1            | HPC7                                   |
| Mtgr1                       | CBFA2T2          | Ery_MEL, Ind_Ery_MEL                   |
| Oct2                        | POU2F2           | B cell                                 |
| p300                        | EP300            | Mac                                    |
| P65                         | RELA             | Act.Mac                                |
| Pparg                       | PPARG            | Mac                                    |
| PU1                         | SPI1             | Act.Mac, B cell, Mac, HPC7             |
| RAG2                        | RAG2             | Thy                                    |
| Runx1                       | RUNX1            | HPC7                                   |
| SCL                         | TAL1             | Ery_MEL, eHPC, Ind_Ery_MEL, HPC7, eHPC |
| Stat3                       | STAT3            | T cell                                 |
| Stat4                       | STAT4            | T cell                                 |
| Stat5a                      | STAT5A           | 13h_T cell, 2x_T cell, 8h_T cell       |
| Stat5b                      | STAT5B           | 13h_T cell, 2x_T cell, 8h_T cell       |
| Stat6                       | STAT6            | T cell                                 |
